# Supplementary material for: Spontaneous Swallowing Frequency in Post-Stroke Patients with and Without Oropharyngeal Dysphagia: An Observational Study
Source: Springer Nature journal article supplement (doi:10.1007/s00455-022-10451-3), 2022-04-23
Supplement: MOESM1 [file 20337858]

## Supplementary material

**Table I:** Stroke characteristics.

|                                                     | All       | PSOD      | PSnOD     | p-value |
|-----------------------------------------------------|-----------|-----------|-----------|---------|
| <b>N</b>                                            | <b>45</b> | <b>27</b> | <b>18</b> |         |
| <b>Chronic lesions in neuroimaging (%)</b>          |           |           |           |         |
| No chronic lesions                                  | 35.56     | 33.33     | 38.88     | 0.7578  |
| Territorial cerebral infarction                     | 8.89      | 11.11     | 5.55      | 0.6396  |
| Lacunar infarction                                  | 28.89     | 29.62     | 27.78     | 1.000   |
| Leucoaraiosis                                       | 46.67     | 51.85     | 38.89     | 0.5434  |
| <b>Vascular territory - of ischemic strokes (%)</b> |           |           |           |         |
| ACM                                                 | 81.58     | 81.82     | 81.25     | 1.000   |
| ACP                                                 | 2.63      | 4.55      | 0.0       | 1.000   |
| AChA                                                | 2.63      | 0.0       | 6.25      | 0.4359  |
| Vertebrobasilar                                     | 10.52     | 13.64     | 6.25      | 0.6133  |
| Indeterminate                                       | 2.63      | 0.0       | 6.25      | 0.4500  |
| <b>Infarct etiology (%)</b>                         |           |           |           |         |
| Atherothrombotic                                    | 26.32     | 27.27     | 25.00     | 1.000   |
| Cardioembolic                                       | 23.68     | 27.27     | 18.75     | 0.7060  |
| Lacunar                                             | 15.79     | 18.19     | 18.75     | 1.000   |
| Indeterminate                                       | 34.21     | 27.27     | 37.50     | 0.7249  |
| <b>Hemorrhage etiology (%)</b>                      |           |           |           |         |
| Hypertension                                        | 100.00    | 100.00    | 100.00    | 1.000   |

PSOD - Post-stroke patients with oropharyngeal dysphagia; PSnOD, Post-stroke patients without oropharyngeal dysphagia
